# Supplementary material for: The Inflammatory Kinase MAP4K4 Promotes Reactivation of Kaposi's Sarcoma Herpesvirus and Enhances the Invasiveness of Infected Endothelial Cells
Source: PubMed Central journal article supplement (PMC3820715; doi:10.1371/journal.ppat.1003737), 2013-11-07

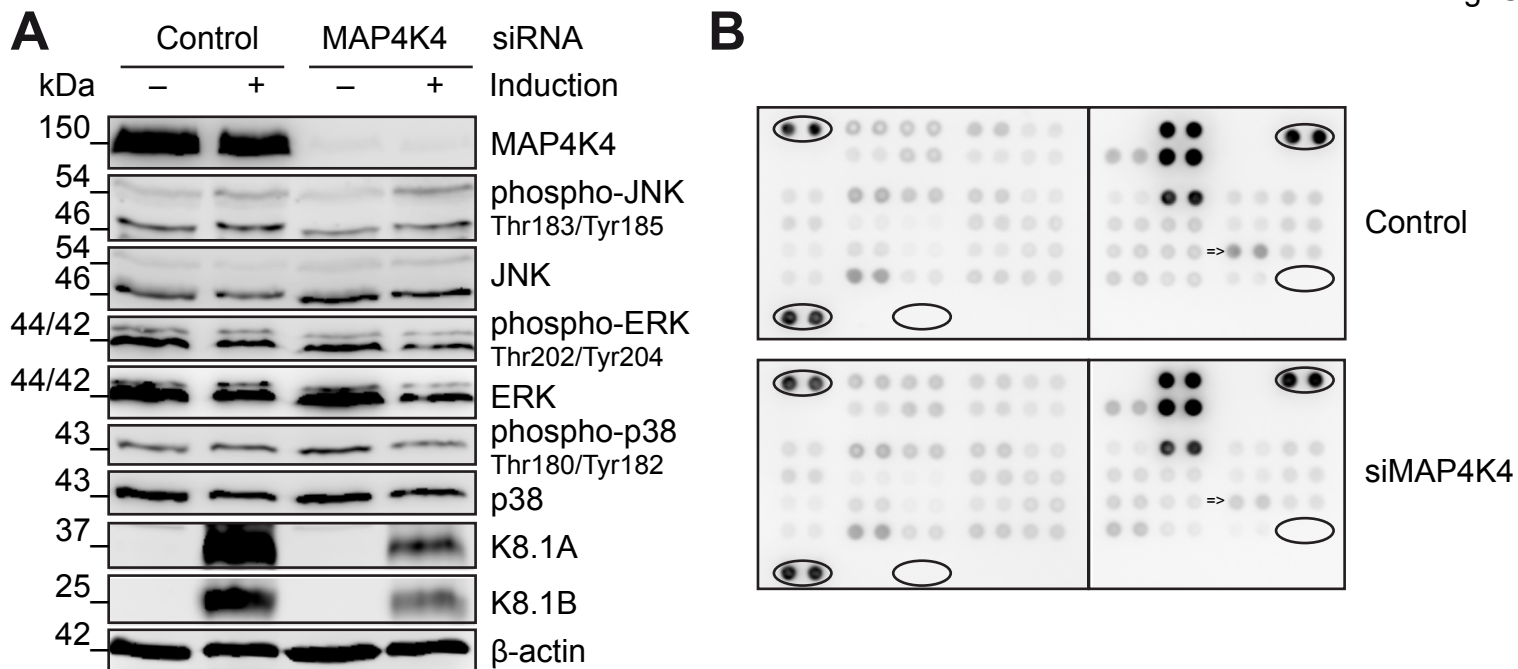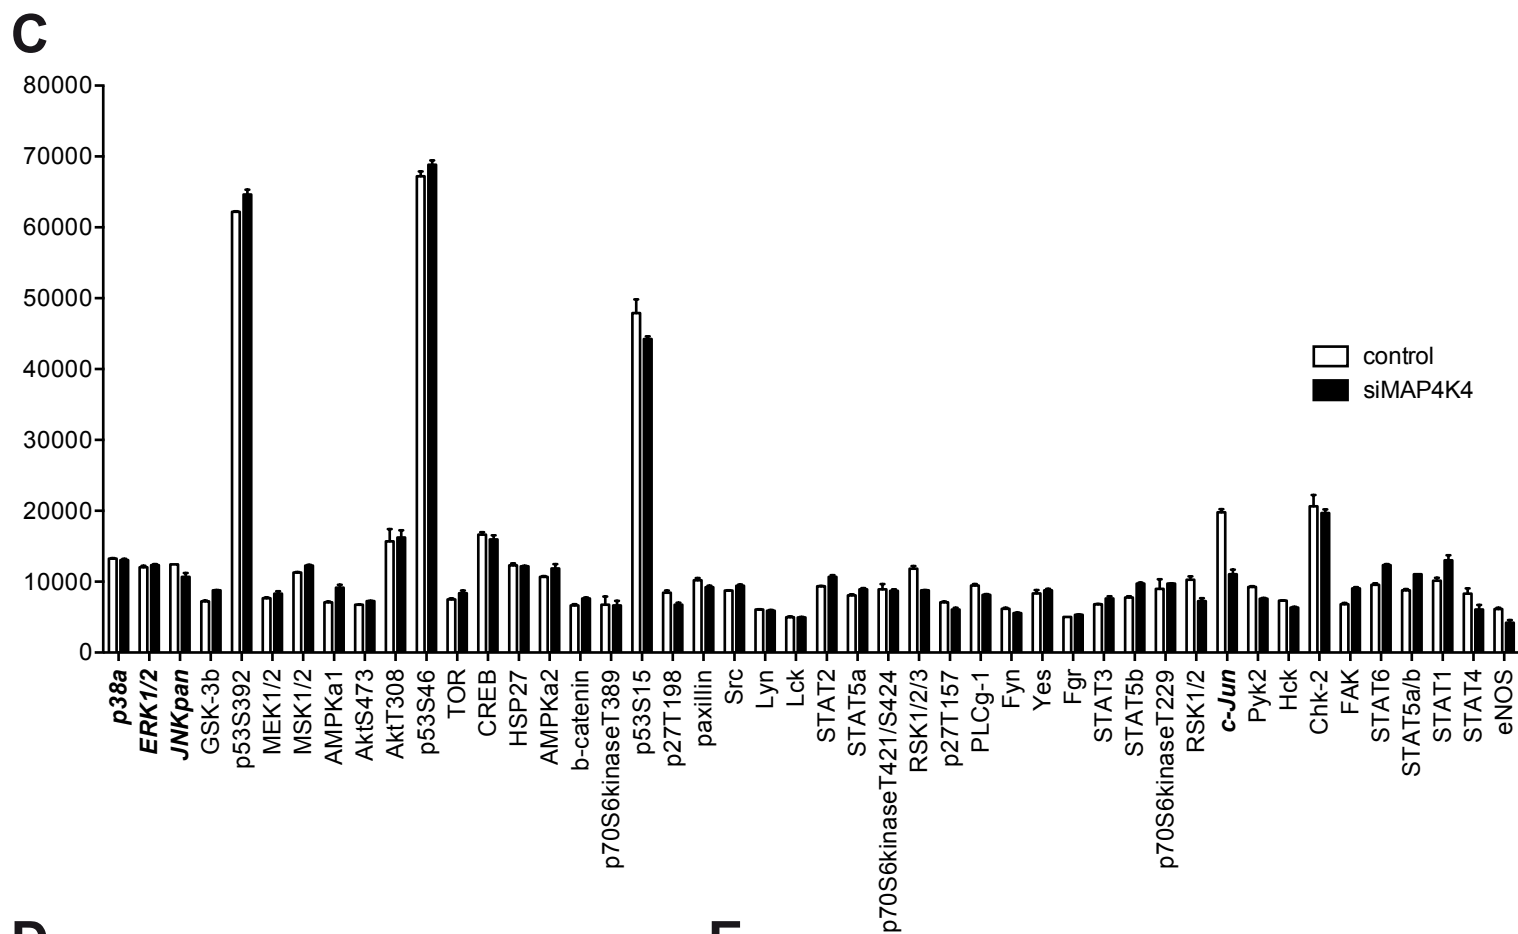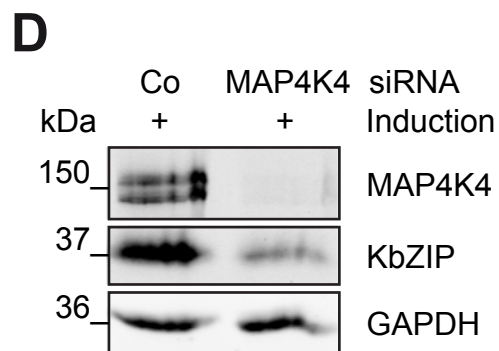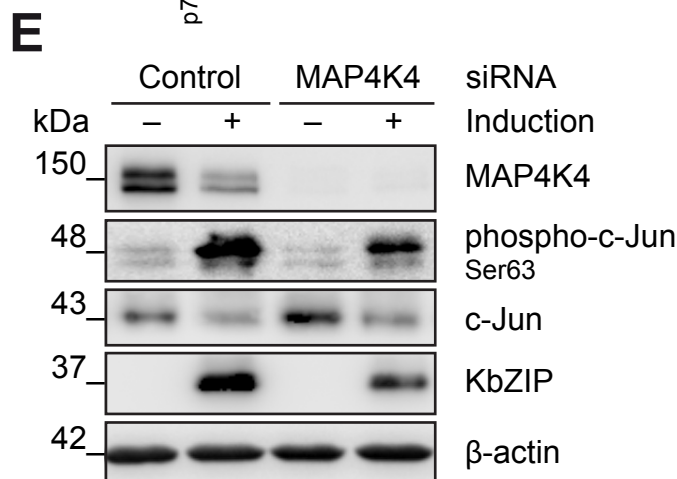

Supplement: ppat.1003737.s003.pdf [file ppat.1003737.s003.pdf]
